# Supplementary material
Source: PubMed Central journal article supplement (PMC9308171)
Supplement: NIHMS1823873-supplement-Supplemental_Figure_2.pdf [file NIHMS1823873-supplement-Supplemental_Figure_2.pdf]

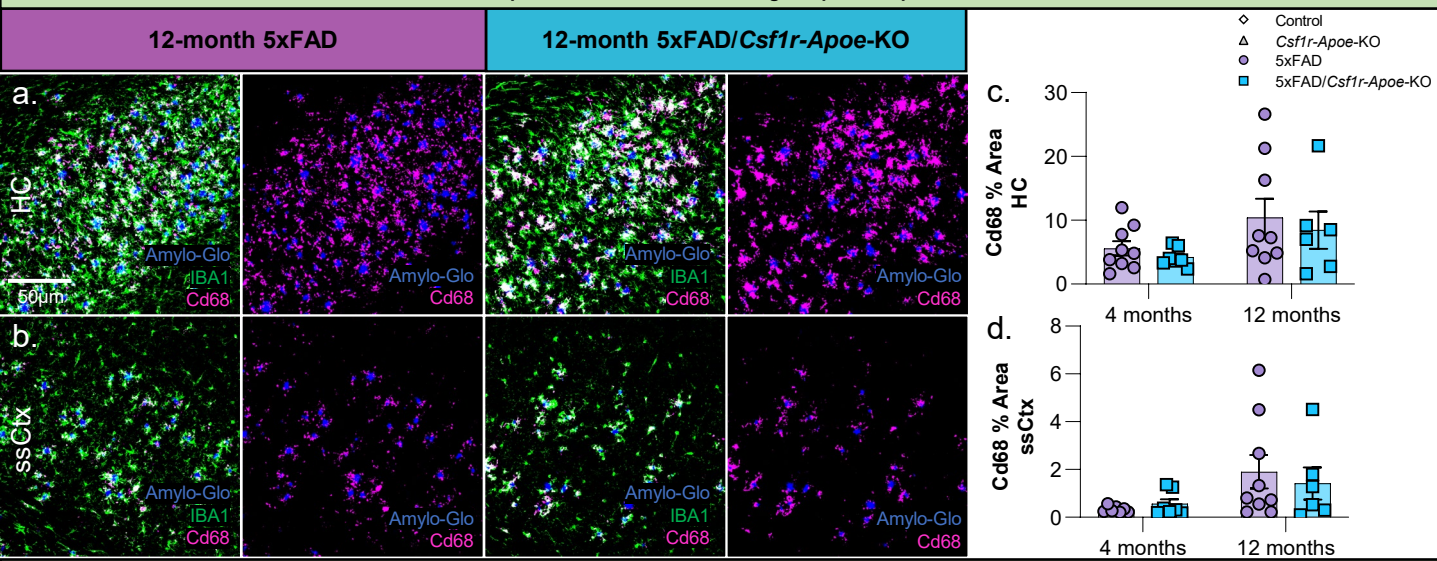

P2ry12 intensity is reduced with microglial-specific ApoE knock-out

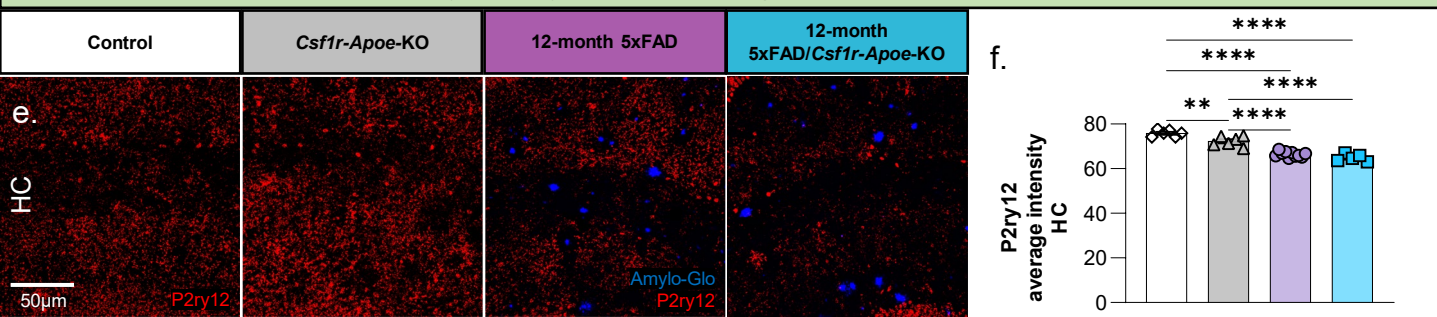

ApoE secreted by other cells is still taken up by microglia in 5xFAD/Csf1r-Apoe-KO mice

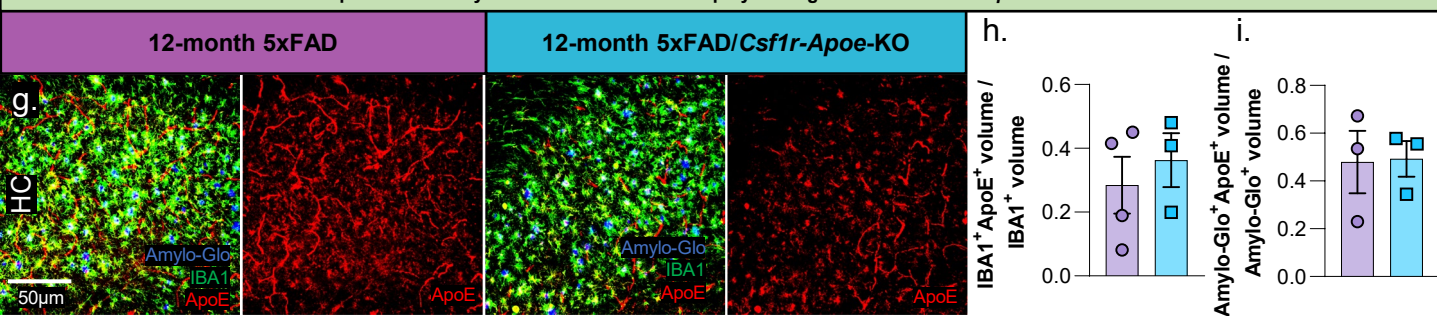

Fig. S2
