# Supplementary material
Source: PubMed Central journal article supplement (PMC9308171)

a.

4-month 5xFAD

4-month 5xFAD/*Csf1r*-*ApoE*-KO

12-month 5xFAD

12-month 5xFAD/*Csf1r*-*ApoE*-KO

Amylo-Glo

Fig. S1

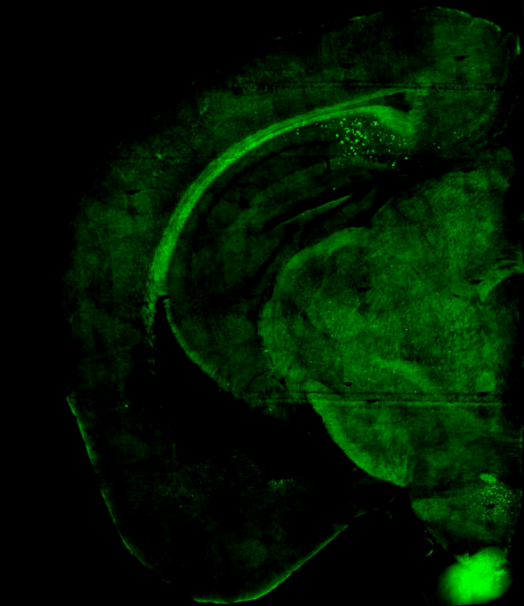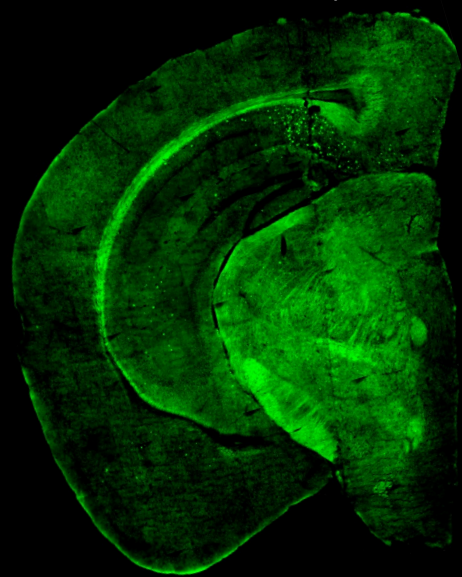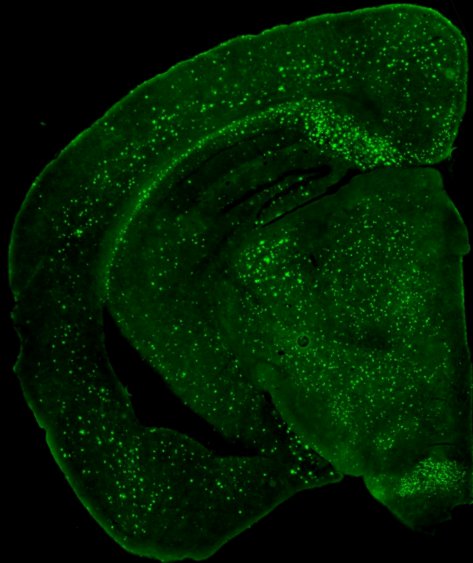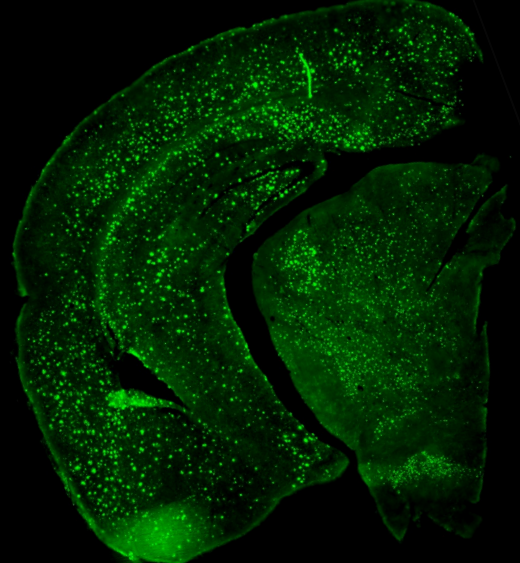

Supplement: NIHMS1823873-supplement-Supplemental_Figure_1.pdf [file NIHMS1823873-supplement-Supplemental_Figure_1.pdf]

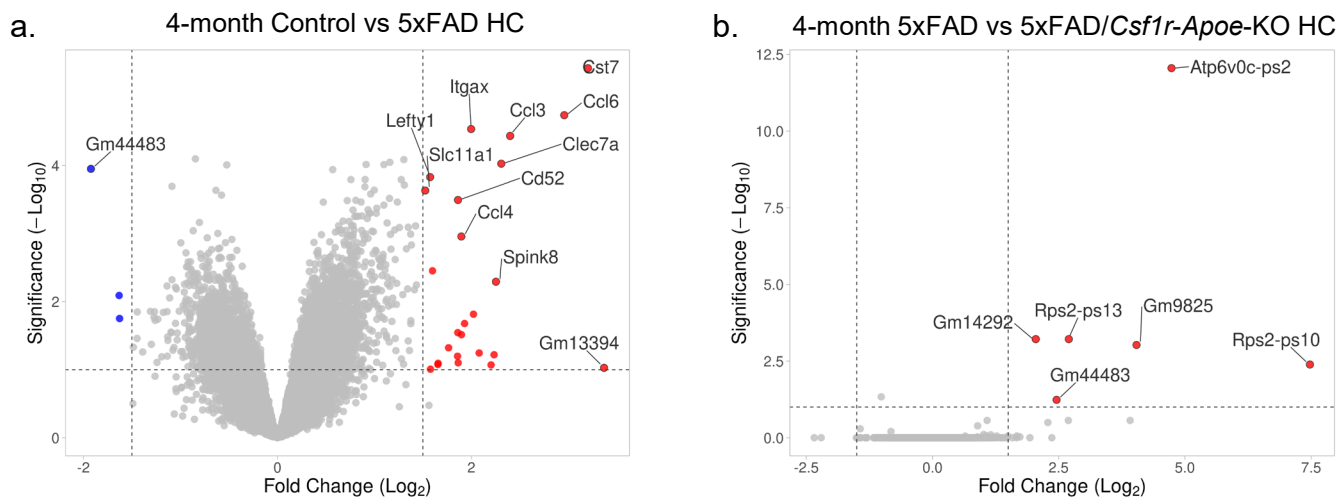

WGCNA Dendrogram highlighting 15 independent modules

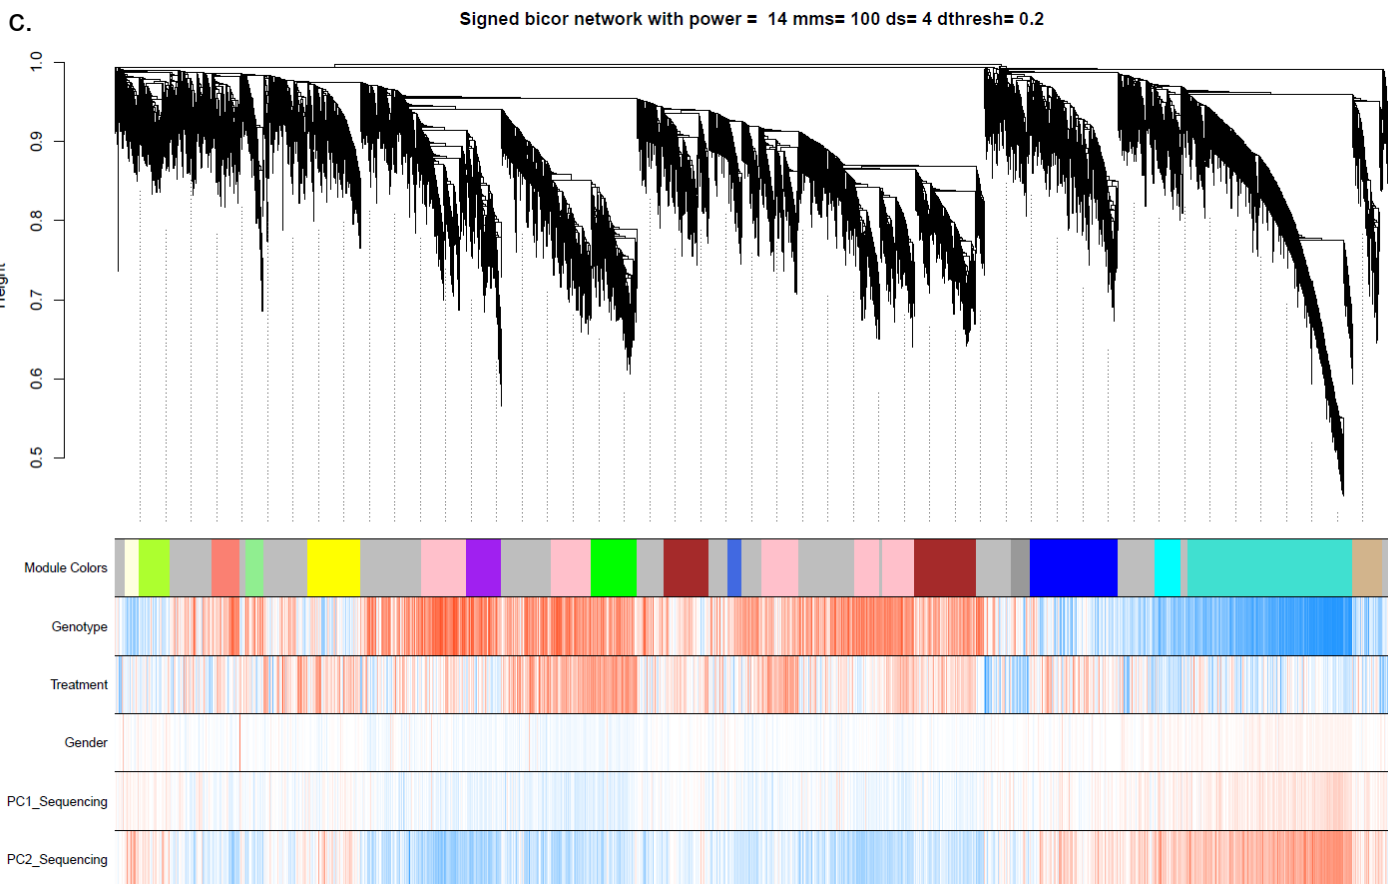

Fig. S3

Supplement: NIHMS1823873-supplement-Supplemental_Figure_3.pdf [file NIHMS1823873-supplement-Supplemental_Figure_3.pdf]
